# Supplementary material for: Prey Status Affects Paralysis Investment in the Ponerine Ant Harpegnathos venator
Source: MDPI journal article supplement (doi:10.3390/insects13010026), 2021-12-25
Supplement: s1 [file s1]

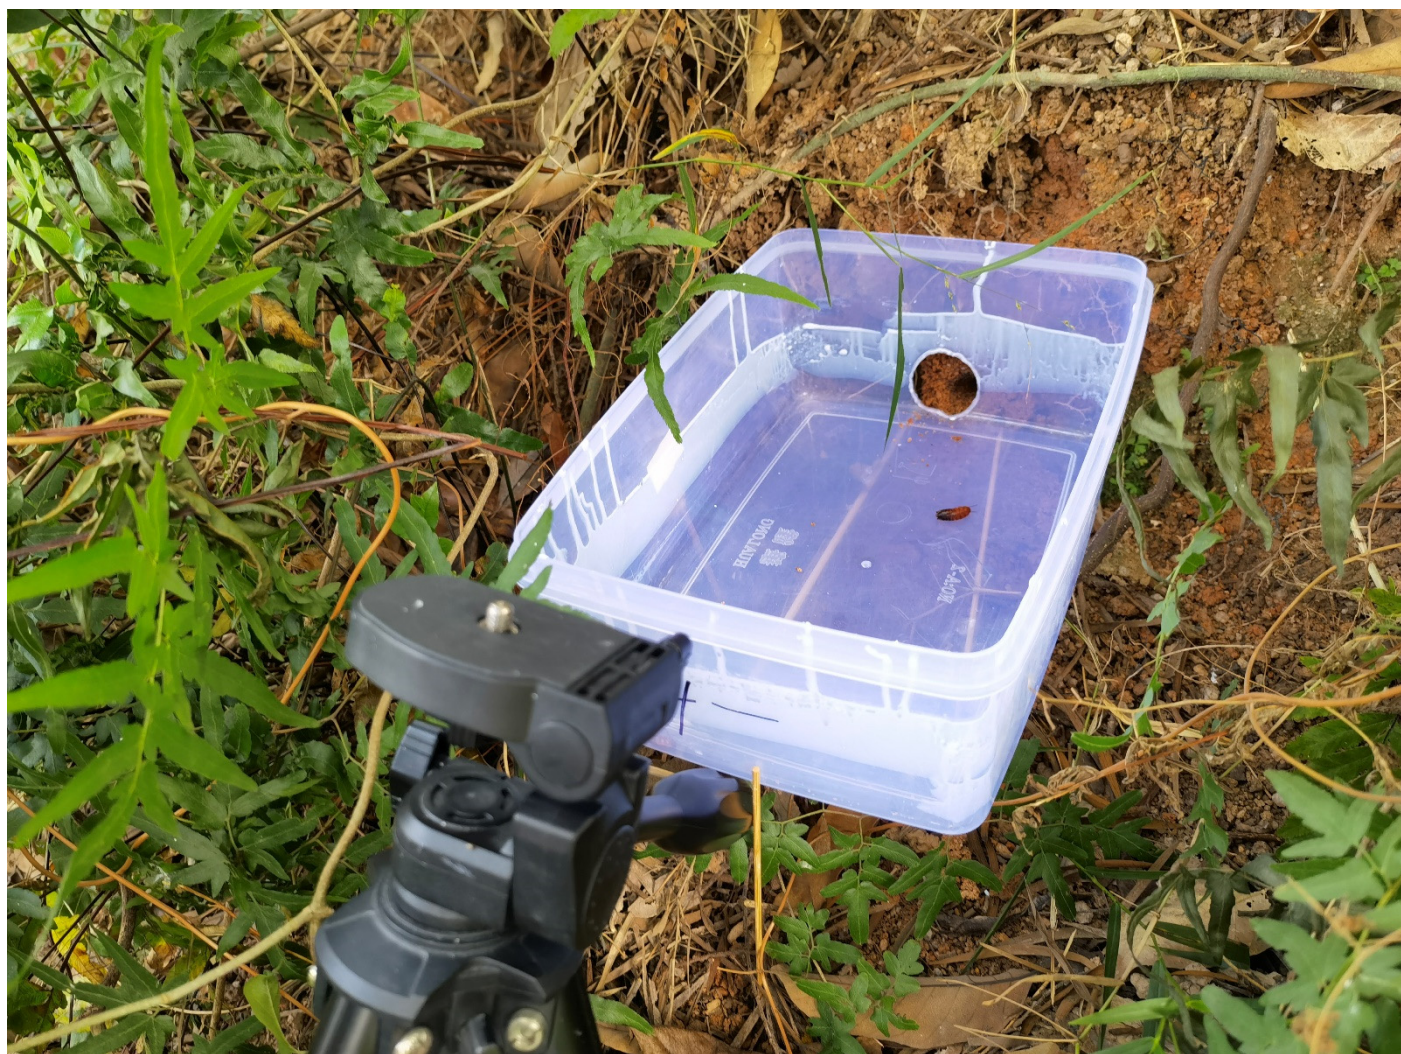

**Figure S1.** Field experiment for the paralysis behavior of *Harpegnathos venator* when provided with different types of preys.
